# Supplementary material
Source: PubMed Central journal article supplement (PMC10528340)
Supplement: NIHMS1915766-supplement-322337_Major_Resources_Table.pdf [file NIHMS1915766-supplement-322337_Major_Resources_Table.pdf]

## Major Resources Table

In order to allow validation and replication of experiments, all essential research materials listed in the Methods should be included in the Major Resources Table below. Authors are encouraged to use public repositories for protocols, data, code, and other materials and provide persistent identifiers and/or links to repositories when available. Authors may add or delete rows as needed.

### Animals (in vivo studies)

| Species | Vendor or Source     | Background Strain | Sex  | Persistent ID / URL |
|---------|----------------------|-------------------|------|---------------------|
| Mouse   | Jackson Laboratories | C57BL/6J          | M    | Stock #000664       |
| Rat     | Charles River        | Sprague-Dawley    | Both | Stock #400          |

### Genetically Modified Animals

| Description                 | Species | Vendor or Source                                      | Background Strain | Other Information                                                                                                                                                 | Persistent ID / URL |
|-----------------------------|---------|-------------------------------------------------------|-------------------|-------------------------------------------------------------------------------------------------------------------------------------------------------------------|---------------------|
| <i>Ucp1</i> <sup>-/-</sup>  | Mouse   | Jackson Laboratories                                  | C57BL/6J          |                                                                                                                                                                   | Stock # 003124      |
| <i>Bmp3b</i> <sup>-/-</sup> | Mouse   | Courtesy of Dr. Se-Jin Lee (Johns Hopkins University) | C57BL6J           | have been described previously (Zhao R, Lawler AM, Lee S-J. Characterization of GDF-10 Expression Patterns and Null Mice [Internet]. Dev Biol 1999;212(1):68–79.) | NA                  |

### Antibodies

| Target antigen                      | Vendor or Source | Catalog #   | Working concentration | Persistent ID / URL                                                                                                                                                                                                                                         |
|-------------------------------------|------------------|-------------|-----------------------|-------------------------------------------------------------------------------------------------------------------------------------------------------------------------------------------------------------------------------------------------------------|
| CD31 (PECAM1)                       | Dianova          | DIA-310     | 1:200                 | <a href="https://www.dianova.com/en/shop/dia-310-anti-cd31-mssw-from-rat-sz31-unconj-for-mouse-ffpe-tissue/">https://www.dianova.com/en/shop/dia-310-anti-cd31-mssw-from-rat-sz31-unconj-for-mouse-ffpe-tissue/</a>                                         |
| TH                                  | Millipore        | AB152       | 1:200                 | <a href="https://www.emdmillipore.com/US/en/product/Anti-Tyrosine-Hydroxylase-Antibody,MM_NF-AB152">https://www.emdmillipore.com/US/en/product/Anti-Tyrosine-Hydroxylase-Antibody,MM_NF-AB152</a>                                                           |
| phospho-Smad2/3                     | Cell Signaling   | #8828       | 1:1000                | <a href="https://www.cellsignal.com/products/primary-antibodies/phospho-smad2-ser465-467-smad3-ser423-425-d27f4-rabbit-mab/8828">https://www.cellsignal.com/products/primary-antibodies/phospho-smad2-ser465-467-smad3-ser423-425-d27f4-rabbit-mab/8828</a> |
| Smad2/3                             | Cell Signaling   | #5678       | 1:1000                | <a href="https://www.cellsignal.com/products/primary-antibodies/smاد2-3-antibody/5678">https://www.cellsignal.com/products/primary-antibodies/smاد2-3-antibody/5678</a>                                                                                     |
| phospho-Smad1/5                     | Cell Signaling   | #9516       | 1:1000                | <a href="https://www.cellsignal.com/products/primary-antibodies/phospho-smad1-5-ser463-465-41d10-rabbit-mab/9516">https://www.cellsignal.com/products/primary-antibodies/phospho-smad1-5-ser463-465-41d10-rabbit-mab/9516</a>                               |
| Smad1                               | Cell Signaling   | #6944       | 1:1000                | <a href="https://www.cellsignal.com/products/primary-antibodies/smاد1-d59d7-xp-rabbit-mab/6944">https://www.cellsignal.com/products/primary-antibodies/smاد1-d59d7-xp-rabbit-mab/6944</a>                                                                   |
| β-actin                             | Cell Signaling   | #3700       | 1:3000                | <a href="https://www.cellsignal.com/products/primary-antibodies/b-actin-8h10d10-mouse-mab/3700">https://www.cellsignal.com/products/primary-antibodies/b-actin-8h10d10-mouse-mab/3700</a>                                                                   |
| Gapdh                               | Cell Signaling   | #2118       | 1:3000                | <a href="https://www.cellsignal.com/products/primary-antibodies/gapdh-14c10-rabbit-mab/2118">https://www.cellsignal.com/products/primary-antibodies/gapdh-14c10-rabbit-mab/2118</a>                                                                         |
| Ucp1                                | Novus            | #NB100-2828 | 1:1000                | <a href="https://www.novusbio.com/products/ucp1-antibody_nb100-2828">https://www.novusbio.com/products/ucp1-antibody_nb100-2828</a>                                                                                                                         |
| Bmp3b                               | Thermo Fisher    | PA5-70041   | 1:1000                | <a href="https://www.thermofisher.com/antibody/product/GDF10-Antibody-Polyclonal/PA5-70041?imageId=137108">https://www.thermofisher.com/antibody/product/GDF10-Antibody-Polyclonal/PA5-70041?imageId=137108</a>                                             |
| Anti-mouse IgG, HRP-linked Antibody | Cell Signaling   | #7076       | 1:2000                | <a href="https://www.cellsignal.com/products/secondary-antibodies/anti-mouse-igg-hrp-linked-antibody/7076">https://www.cellsignal.com/products/secondary-antibodies/anti-mouse-igg-hrp-linked-antibody/7076</a>                                             |

|                                      |                |       |        |                                                                                                                                                                                                                   |
|--------------------------------------|----------------|-------|--------|-------------------------------------------------------------------------------------------------------------------------------------------------------------------------------------------------------------------|
| Anti-rabbit IgG, HRP-linked Antibody | Cell Signaling | #7074 | 1:2000 | <a href="https://www.cellsignal.com/products/secondary-antibodies/anti-rabbit-igg-hrp-linked-antibody/7074">https://www.cellsignal.com/products/secondary-antibodies/anti-rabbit-igg-hrp-linked-antibody/7074</a> |
|--------------------------------------|----------------|-------|--------|-------------------------------------------------------------------------------------------------------------------------------------------------------------------------------------------------------------------|

## DNA/cDNA Clones: None

## Cultured Cells

| Name                               | Vendor or Source           | Sex (F, M, or unknown) | Persistent ID / URL |
|------------------------------------|----------------------------|------------------------|---------------------|
| Rat Neonatal Cardiomyocytes (RNCM) | Isolated in our laboratory | Both                   | NA                  |

## Data & Code Availability

| Description  | Source / Repository                                            | Persistent ID / URL                                                                                                                     |
|--------------|----------------------------------------------------------------|-----------------------------------------------------------------------------------------------------------------------------------------|
| RNA-seq data | Gene Expression Omnibus database (accession number GSE210613). | <a href="https://www.ncbi.nlm.nih.gov/geo/query/acc.cgi?acc=GSE210613">https://www.ncbi.nlm.nih.gov/geo/query/acc.cgi?acc=GSE210613</a> |

## Other

| Description                                                                      | Source / Repository  | Persistent ID / URL |
|----------------------------------------------------------------------------------|----------------------|---------------------|
| Recombinant Human BMP-3b/GDF-10 Protein                                          | R&D Systems          | 1543-BP             |
| 2,3,5-Triphenyltetrazolium chloride (TTC)                                        | Sigma-Aldrich        | T8877               |
| FluoSpheres™ Polystyrene Microspheres, 10 μm, yellow-green fluorescent (505/515) | Invitrogen           | F8836               |
| K02288                                                                           | Cayman Chemical      | 16678               |
| β-cyclodextrin                                                                   | Sigma-Aldrich        | C4767               |
| Alzet osmotic minipumps                                                          | Alza Durect Corp     | 1002                |
| Isoproterenol                                                                    | Sigma-Aldrich        | I6504               |
| NOVOLIN R- human insulin injection, solution                                     | Novo Nordisk         | NDC 0169-1833-11    |
| Dextrose (D-Glucose), Anhydrous                                                  | Thermo Fisher        | D163                |
| DMEM, high glucose, GlutaMAX™ Supplement, pyruvate                               | Gibco                | 10569010            |
| DMEM, no glucose                                                                 | Gibco                | 11966025            |
| Pierce™ Primary Cardiomyocyte Isolation Kit                                      | Thermo Scientific    | 88281               |
| Fetal Bovine Serum                                                               | Sigma                | F2442               |
| Penicillin-Streptomycin (10,000 U/mL)                                            | Gibco                | 15140122            |
| L-Glutamine (200 mM)                                                             | Gibco                | 25030081            |
| BMP3b ELISA kit (Mouse)                                                          | GBiosciences         | #IT5716             |
| Cardiac Troponin T ELISA kit (Mouse)                                             | Life Diagnostic      | CTNI-1-HSP          |
| BMP3b ELISA kit (Human)                                                          | LifeSpan Biosciences | LS-F26940-1         |
| Pierce™ BCA Protein Assay Kit                                                    | Thermo Scientific    | 23225               |
| Pierce™ Protein-Free Blocking Buffer                                             | Thermo Scientific    | 37570               |
| Bovine Serum Albumin                                                             | Sigma-Aldrich        | A7906               |
| Pierce™ ECL Western Blotting Substrate                                           | Thermo Scientific    | 32106               |
| 30% acrylamide and bis-acrylamide solution, 37.5:1                               | BioRad               | 1610158             |
| RIPA Buffer (10X)                                                                | Cell Signaling       | 9806S               |
| PhosSTOP™                                                                        | Roche                | 4906837001          |

DOI [to be added]

|                                                        |                      |             |
|--------------------------------------------------------|----------------------|-------------|
| cOmplete™, Mini, EDTA-free Protease Inhibitor Cocktail | Roche                | 11836170001 |
| 10x Tris/Glycine/SDS                                   | BioRad               | 1610732     |
| 10x Tris Buffered Saline (TBS)                         | BioRad               | 1706435     |
| 4x Laemmli Sample Buffer                               | BioRad               | 1610747     |
| TEMED                                                  | BioRad               | 1610800     |
| Tris base                                              | BioRad               | 1610719     |
| Glycine                                                | Fisher Scientific    | BP381-500   |
| HyBlot CL® Autoradiography Film                        | Thomas Scientific    | 1141J52     |
| Immobilon®-P PVDF Membrane                             | Milipore             | IPVH00010   |
| TRIzol™ Reagent                                        | Invitrogen           | 15596018    |
| RNeasy Plus Mini Kit                                   | Qiagen               | 74136       |
| Agilent RNA 6000 Nano Kit                              | Agilent Technologies | 5067-1511   |
| TruSeq Stranded mRNA HT Sample Prep Kit                | Illumina             | 20020594    |
| High-Capacity cDNA Reverse Transcription Kit           | Applied Biosystems   | 4368814     |
| Luna® Universal Probe qPCR Master Mix (Taqman)         | New England BioLabs  | M3004L      |
| Caspase-Glo® 3/7 Assay System                          | Promega              | G8090       |
| TUNEL Label Mix                                        | Roche                | 11767291910 |
| TUNEL Enzyme                                           | Roche                | 11767305001 |

#### List of qRT-PCR/PCR primers

| Gene  | Chemistry | Persistent ID / URL      |
|-------|-----------|--------------------------|
| Bmp3b | TaqMan    | IDT (Mm.PT.58.31156962)  |
| Ucp1  | TaqMan    | IDT (Mm.PT.58.7088262)   |
| Tbp   | TaqMan    | IDT (Mm.PT.39a.22214839) |

#### ARRIVE GUIDELINES

The ARRIVE guidelines (<https://arriveguidelines.org/>) are a checklist of recommendations to improve the reporting of research involving animals. Key elements of the study design should be included below to better enable readers to scrutinize the research adequately, evaluate its methodological rigor, and reproduce the methods or findings.

#### Study Design: NA

**Sample Size:** Please explain how the sample size was decided Please provide details of any *a priori* sample size calculation, if done.

Assuming a SD of 10% in the MI size, we need 8 surviving mice in each group to show a 15% difference in the MI size between two strains of mice or a reversal in this difference using an intervention with a power of 85% and a type 1 error of 5%. Based on an assumed mortality of 10% after I/R injury, we used 9 mice in each group.

(Difference 15%, SD 10%, Power 85%, type 1 error 5%).

**Inclusion Criteria.** Mice aged 8-10 weeks were included.

**Exclusion Criteria.** There were no *a priori* exclusion criteria. Mice that died before reaching the endpoint of the experiment, that is 24 hours after I/R for the measurement of cardiac injury or 3 hours after I/R in the investigation of the SMAD pathways were excluded from the analysis.

DOI [to be added]

**Randomization.** Mice were randomized to treatments based on body weight prior to intervention, and according to their genotype.

**Blinding.** Each mouse or human sample was given a number, and the relevant characteristics of this sample (genotype of the mouse, procedure, treatment, timing of the sample) were entered in a master file. The investigator analyzing the variables of interest (MI size, area at risk, cardiac troponin, body weight, glucose levels etc..) was only aware of the number and blinded to the characteristics of the sample that was analyzed.
