# Supplementary material
Source: PubMed Central journal article supplement (PMC10528340)

# FULL UNEDITED GELS

## Full unedited gel for Figure 1

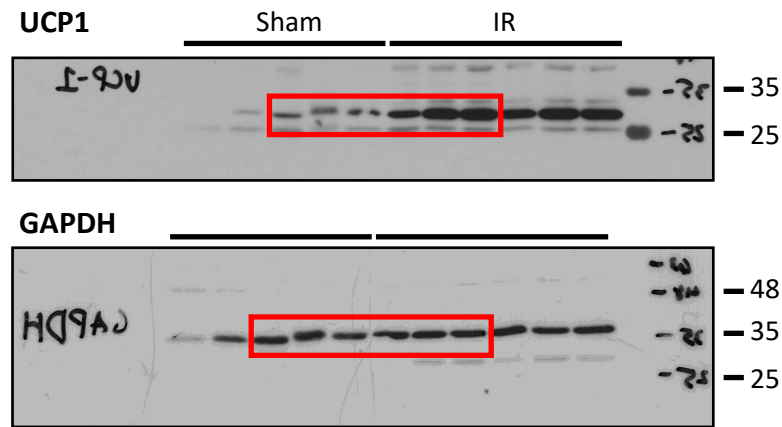

## Full unedited gel for Figure 3

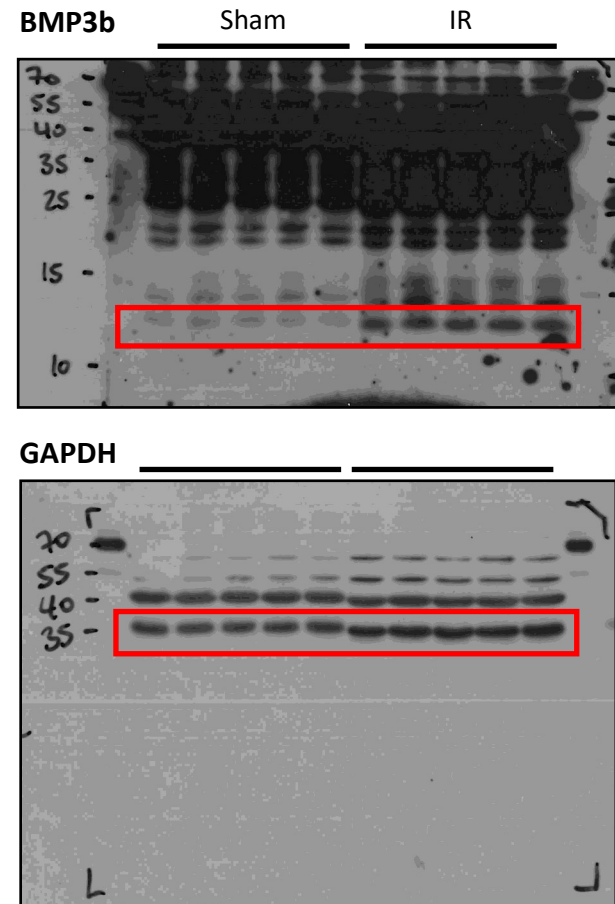

### Full unedited gel for Figure 6

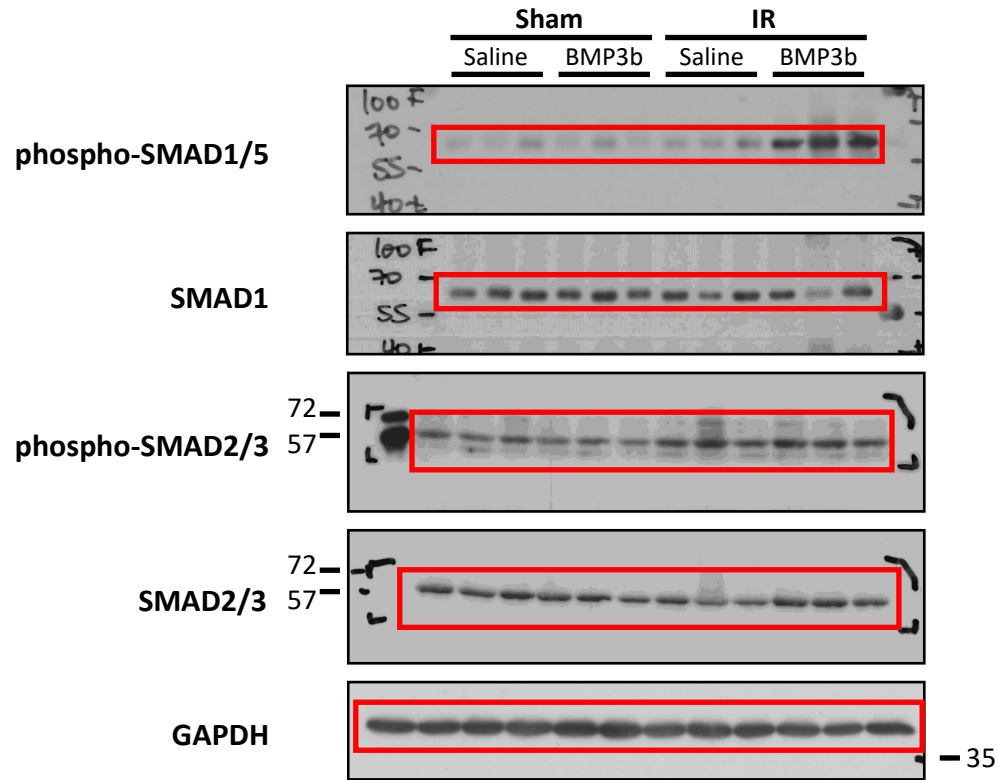

### Full unedited gel for Figure 7

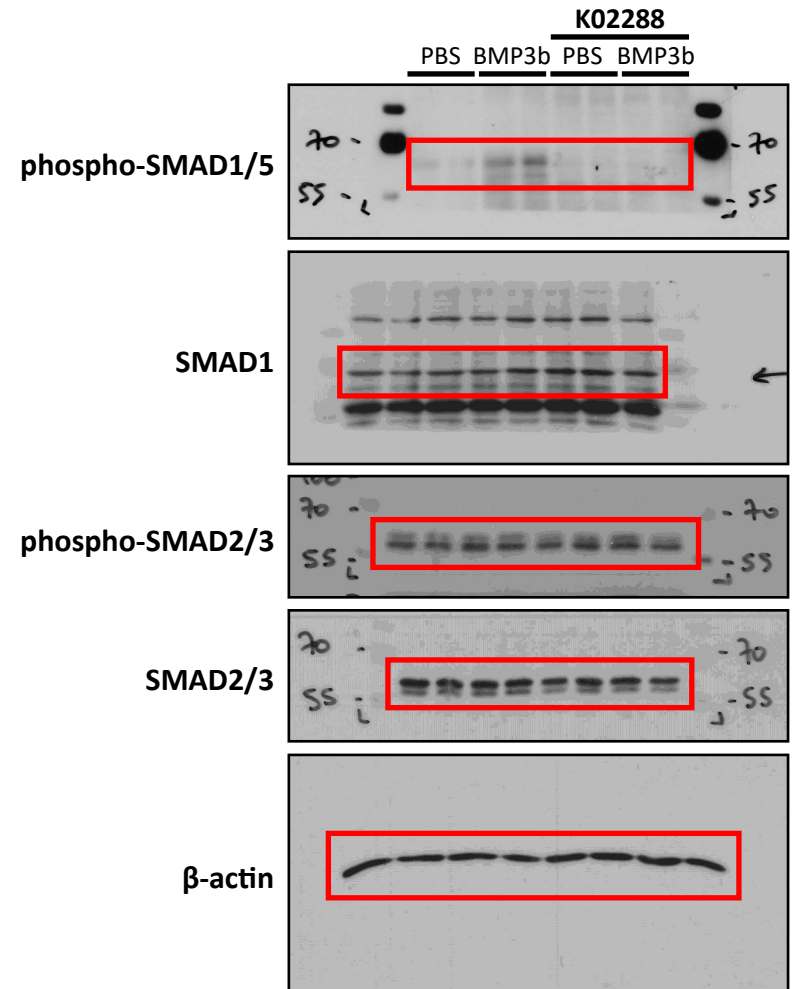

Supplement: NIHMS1915766-supplement-322337_Uncut_Gel_Blots.pdf [file NIHMS1915766-supplement-322337_Uncut_Gel_Blots.pdf]
